# Supplementary material for: Adverse effect of smoking on surgical site infection following ankle and calcaneal fracture fixation: a meta-analysis
Source: PubMed Central journal article supplement — EFORT Open Rev. 2024 Aug 1;9(8):817–26. doi: 10.1530/EOR-23-0139 (PMC11370714; doi:10.1530/eor-23-0139), 2024-08-01
Supplement: EOR-23-0139supplementary_table_1.pdf [file EOR-23-0139supplementary_table_1.pdf]

**Supplementary Table S1** Results of methodological quality of the included studies based on Newcastle–Ottawa Scale (NOS).

| <b>Newcastle Ottawa Scale</b> |                  |                      |                 |              |
|-------------------------------|------------------|----------------------|-----------------|--------------|
| <b>Cohort Studies</b>         |                  |                      |                 |              |
| <b>Reference</b>              | <b>Selection</b> | <b>Comparability</b> | <b>Outcome</b>  | <b>Score</b> |
| <i>Sagherian et al. (1)</i>   | ****             | **                   | **              | 8            |
| <i>Davey et al. (2)</i>       | ***              | **                   | *               | 6            |
| <i>Jensen et al. (3)</i>      | ***              | **                   | ***             | 8            |
| <i>Braunstein et al. (4)</i>  | ***              | **                   | **              | 7            |
| <i>Abdelgaid et al. (5)</i>   | *                | **                   | **              | 5            |
| <i>Olsen et al. (6)</i>       | ****             | **                   | *               | 7            |
| <i>Sun et al. (7)</i>         | ****             | **                   | *               | 7            |
| <i>Naumann et al. (8)</i>     | ***              | **                   | *               | 6            |
| <i>Soni et al. (9)</i>        | ***              | *                    | *               | 5            |
| <i>Schepers et al. (10)</i>   | **               | **                   | **              | 6            |
| <b>Case-Control Studies</b>   |                  |                      |                 |              |
| <b>Reference</b>              | <b>Selection</b> | <b>Comparability</b> | <b>Exposure</b> | <b>Total</b> |
| <i>Shen et al. (11)</i>       | ***              | *                    | **              | 6            |
| <i>Zhao et al. (12)</i>       | ***              | **                   | **              | 7            |
| <i>Sato et al. (13)</i>       | **               | **                   | **              | 6            |
| <i>Lu et al. (14)</i>         | ***              | **                   | **              | 7            |
| <i>Liu et al. (15)</i>        | **               | **                   | **              | 6            |
| <i>Su et al. (16)</i>         | **               | **                   | **              | 6            |

## References

1. Sagherian BH, Hoballah JJ, Tamim H. Comparing the 30-Day Complications Between Smokers and Nonsmokers Undergoing Surgical Fixation of Ankle Fractures. *Foot Ankle Orthop.* 2022;7(3):24730114221115677.
2. Davey MS, Staunton P, Lambert LA, Davey MG, Walsh JC. Evaluating Short-Term Outcomes Post-Intra-Articular Calcaneal Fracture Fixation via a Sinus Tarsi Approach in a Non-Exclusively Selected Cohort. *J Foot Ankle Surg.* 2021;60(2):302-6.
3. Giver Jensen T, Aqeel Khudhair Almadareb M, Booth Nielsen M, Jesper Hansen E, Lindberg-Larsen M. Outcome After Treatment of Distal Fibula Fractures Using One-Third Tubular Plate, Locking Compression Plate or Distal Anatomical Locking Compression Plate. *J Foot Ankle Surg.* 2023;62(3):524-8.
4. Braunstein M, Baumbach SF, Urresti-Gundlach M, Borgmann L, Bocker W, Polzer H. Arthroscopically Assisted Treatment of Complex Ankle Fractures: Intra-articular Findings and 1-Year Follow-Up. *J Foot Ankle Surg.* 2020;59(1):9-15.
5. Abdelgaid SM, Moursy AF, Elgebaly EAA, Aboelenien AM. Minimally Invasive Treatment of Ankle Fractures in Patients at High Risk of Soft Tissue Wound Healing Complications. *Journal of Foot and Ankle Surgery.* 2018;57(3):557-71.
6. Olsen LL, Møller AM, Brorson S, Hasselager RB, Sort R. The impact of lifestyle risk factors on the rate of infection after surgery for a fracture of the ankle. *Bone Joint J.* 2017;99-b(2):225-30.
7. Sun R, Li M, Wang X, Li X, Wu L, Chen Z, et al. Surgical site infection following open reduction and internal fixation of a closed ankle fractures: A retrospective multicenter cohort study. *International Journal of Surgery.* 2017;48:86-91.
8. Naumann MG, Sigurdson U, Utvåg SE, Stavem K. Functional outcomes following surgical-site infections after operative fixation of closed ankle fractures. *Foot Ankle Surg.* 2017;23(4):311-6.
9. Soni A, Vollans S, Malhotra K, Mann C. Association Between Smoking and Wound Infection Rates Following Calcaneal Fracture Fixation. *Foot Ankle Spec.* 2014;7(4):266-70.
10. Schepers T, De Vries MR, Van Lieshout EM, Van der Elst M. The timing of ankle fracture surgery and the effect on infectious complications; a case series and systematic review of the literature. *Int Orthop.* 2013;37(3):489-94.
11. Shen L, Wang Q, Chen J, Jiang Z. Risk factor of postoperative incision infection after plate internal fixation of calcaneal fractures: a retrospective study. *BMC Musculoskelet Disord.* 2022;23(1):1091.
12. Zhao H, Meng J, Sun T, Wan Z, Qin S, Zhang F, et al. Risk factors for deep surgical site infection following surgically treated peri-ankle fractures: a case-control study based on propensity score matching. *J Orthop Surg Res.* 2022;17(1):542.
13. Sato T, Takegami Y, Sugino T, Bando K, Fujita T, Imagama S. Smoking and trimalleolar fractures are risk factors for infection after open reduction and internal fixation of closed ankle fractures: A multicenter retrospective study of 1,201 fractures. *Injury.* 2021;52(7):1959-63.
14. Lu K, Ma T, Yang C, Qu Q, Liu H. Risk prediction model for deep surgical site infection (DSSI) following open reduction and internal fixation of displaced intra-articular calcaneal fracture. *Int Wound J.* 2022;19(3):656-65.
15. Liu D, Zhu Y, Chen W, Li M, Liu S, Zhang Y. Multiple preoperative biomarkers are associated with incidence of surgical site infection following surgeries of ankle fractures. *International Wound Journal.* 2020;17(3):842-50.

16. Su J, Cao X. Risk factors of wound infection after open reduction and internal fixation of calcaneal fractures. *Medicine (Baltimore)*. 2017;96(44):e8411.
